# Supplementary material for: Is Long-term Exposure to Air Pollution Associated with Episodic Memory? A Longitudinal Study from Northern Sweden
Source: PubMed Central journal article supplement (PMC5630578; doi:10.1038/s41598-017-13048-1), 2017-10-06
Supplement: 41598_2017_13048_MOESM1_ESM.pdf [file 41598_2017_13048_MOESM1_ESM.pdf]

Supplementary Files to the manuscript with the title: “Is Long-term Exposure to Air Pollution Associated with Episodic Memory? A Longitudinal Study from Northern Sweden”

Authors: Anna Oudin<sup>1\*</sup>, Bertil Forsberg<sup>1</sup>, Nina Lind<sup>2</sup>, Steven Nordin<sup>2</sup>, Daniel Oudin Åström<sup>3</sup>,  
Anna Sundström<sup>2</sup>, Maria Nordin,<sup>2</sup>

<sup>1</sup>Occupational and Environmental Medicine, Public Health and Clinical Medicine, Umeå  
University, 901 87 Umeå, Sweden

<sup>2</sup>Department of Psychology, Umeå University, 901 87 Umeå, Sweden

<sup>3</sup>Family medicine, cardiovascular epidemiology and lifestyle, Lund University, 205 02 Malmö,  
Sweden

Supplementary Table 1. Change in episodic memory composite differences between two consecutive tests ( $\Delta EMM$ ) by age for 1,469 persons in association with air pollution concentrations ( $NO_x$ ) at the home address during follow-up analyzed with a Mixed Linear Model with repeated measurement per individual. Results are presented as  $\Delta EMM$  with 95% confidence intervals (95% CIs), n is the number of measurement pairs. A negative  $\Delta EMM$  denotes a decrease over time.

| Age   | Model 1, n = 2,516<br>$\Delta EMM$ (95% CI) | Model 2, n = 2,059<br>$\Delta EMM$ (95% CI) |
|-------|---------------------------------------------|---------------------------------------------|
| 60    | Ref                                         | Ref                                         |
| 65    | -0.70 (-1.54-0.14)                          | -0.53 (-1.59-0.53)                          |
| 70    | -2.07 (-2.84- -1.30)                        | -2.11 (-3.19- -1.03)                        |
| 75    | -2.81 (-3.66- -1.96)                        | -2.57 (-3.75- -1.39)                        |
| 80    | -4.39 (-5.43- -3.35)                        | -4.66 (-6.09- -3.22)                        |
| 85-95 | -3.78 (-5.29—2.27)                          | -3.49 (-5.40- -1.58)                        |

Model 1 includes variables for  $NO_x$ , age, test occasion, number of total tests, and a cross-product between  $NO_x$  and test occasion

Model 2 is the same as Model 1, but also included variables for education, sex, smoking, BMI, physical activity, living with someone, and work status.

Supplementary Table 2. Change in episodic memory composite differences between two consecutive tests ( $\Delta EMM$ ) by the interaction between time point (T=1-3, 4 is the reference) and NO<sub>x</sub> quartile for 1,469 persons in association with air pollution concentrations (NO<sub>x</sub>) at the home address during follow-up analyzed with a Mixed Linear Model with repeated measurement per individual. Results are presented as  $\Delta EMM$  with 95% confidence intervals (95% CIs), n is the number of measurement pairs. A negative  $\Delta EMM$  denotes a decrease over time.

|   |                          |  | Model 2               |
|---|--------------------------|--|-----------------------|
| T | NO <sub>x</sub> quartile |  | $\Delta EMM$ (95% CI) |
| 1 | 1                        |  | ref                   |
| 1 | 2                        |  | 2.15 (-2.78-7.08)     |
| 1 | 3                        |  | -0.35 (-4.59-3.89)    |
| 1 | 4                        |  | 1.14 (-2.99-5.28)     |
| 2 | 1                        |  | ref                   |
| 2 | 2                        |  | 0.96 (-1.28-3.20)     |
| 2 | 3                        |  | 0.80 (-1.44-3.05)     |
| 2 | 4                        |  | 1.26 (-0.87-3.40)     |
| 3 | 1                        |  | Ref                   |
| 3 | 2                        |  | 1.28 (-1.40-3.97)     |
| 3 | 3                        |  | -1.33 (-3.91-1.25)    |
| 3 | 4                        |  | 1.03 (-1.51-3.56)     |

Model 2 includes variables for NO<sub>x</sub>, age, test occasion, number of total tests, and a cross-product between NO<sub>x</sub> and test occasion, education, sex, smoking, BMI, physical activity, living with someone, and work status.
